# Supplementary material for: Long-term genetic selection reduced prevalence of hip and elbow dysplasia in 60 dog breeds
Source: PubMed Central journal article supplement (PMC5325577; doi:10.1371/journal.pone.0172918), 2017-02-24
Supplement: pone.0172918.s001.pdf [file pone.0172918.s001.pdf]

**S1 Table. Descriptive statistics of the population under study.**

| <b>Breed</b>                   | <b>Hips (n)</b> | <b>% normal</b> |             | <b>Elbows (n)</b> | <b>% normal</b> |             |
|--------------------------------|-----------------|-----------------|-------------|-------------------|-----------------|-------------|
|                                |                 | <b>hips</b>     | <b>%CHD</b> |                   | <b>elbows</b>   | <b>% ED</b> |
| Akita                          | 16142           | 87.74           | 12.26       | 2311              | 98.87           | 1.13        |
| Alaskan malamute               | 13942           | 89.17           | 10.83       | 909               | 97.03           | 2.97        |
| American Staffordshire terrier | 2952            | 75.61           | 24.39       | 753               | 83.93           | 16.07       |
| Anatolian                      | 1924            | 90.23           | 9.77        | 575               | 94.78           | 5.22        |
| Australian cattle dog          | 3631            | 86.56           | 13.44       | 1224              | 90.20           | 9.80        |
| Australian shepherd            | 33353           | 94.67           | 5.33        | 7778              | 96.50           | 3.50        |
| Bearded Collie                 | 4510            | 94.70           | 5.30        | 670               | 98.06           | 1.94        |
| Belgian Malinois               | 2890            | 94.84           | 5.16        | 1749              | 91.37           | 8.63        |
| Belgian sheepdog               | 4152            | 97.18           | 2.82        | 1924              | 95.48           | 4.52        |
| Belgian tervuren               | 6072            | 96.92           | 3.08        | 3416              | 96.11           | 3.89        |
| Bernese mountain dog           | 18516           | 84.98           | 15.02       | 13453             | 74.04           | 25.96       |
| Bichon                         | 3606            | 94.12           | 5.88        | 664               | 99.55           | 0.45        |
| Bloodhound                     | 2830            | 75.34           | 24.66       | 1173              | 86.87           | 13.13       |
| Border collie                  | 11819           | 89.90           | 10.10       | 2834              | 98.87           | 1.13        |
| Bouvier                        | 8134            | 85.87           | 14.13       | 3246              | 92.17           | 7.83        |
| Boxer                          | 5540            | 89.30           | 10.70       | 686               | 99.27           | 0.73        |
| Briard                         | 2456            | 86.97           | 13.03       | 627               | 99.84           | 0.16        |
| Brittany                       | 18532           | 86.26           | 13.74       | 1212              | 98.35           | 1.65        |
| Bullmastiff                    | 5560            | 76.03           | 23.97       | 2415              | 85.80           | 14.20       |
| Cavalier King Charles spaniel  | 6662            | 88.65           | 11.35       | 599               | 99.67           | 0.33        |
| Chesapeake bay retriever       | 12882           | 80.57           | 19.43       | 2594              | 94.76           | 5.24        |
| Chinese shar-pei               | 9571            | 86.90           | 13.10       | 597               | 76.05           | 23.95       |
| Chowchow                       | 5296            | 80.83           | 19.17       | 987               | 51.37           | 48.63       |
| Doberman pinscher              | 15882           | 94.33           | 5.67        | 2428              | 99.18           | 0.82        |
| English setter                 | 10503           | 84.94           | 15.06       | 2940              | 85.78           | 14.22       |
| English Springer               | 15165           | 87.78           | 12.22       | 2520              | 87.46           | 12.54       |
| Flat coated retriever          | 5698            | 96.26           | 3.74        | 2500              | 99.32           | 0.68        |
| German Shepherd                | 107048          | 81.06           | 18.94       | 37233             | 82.17           | 17.83       |
| German shorthaired pointer     | 16310           | 96.13           | 3.87        | 2186              | 99.22           | 0.78        |
| German wirehaired pointer      | 4165            | 91.98           | 8.02        | 739               | 97.83           | 2.17        |
| Giant schnauzer                | 4350            | 83.38           | 16.62       | 546               | 91.58           | 8.42        |
| Golden retriever               | 133920          | 81.16           | 18.84       | 35401             | 90.31           | 9.69        |
| Gordon setter                  | 6094            | 81.72           | 18.28       | 907               | 87.43           | 12.57       |
| great dane                     | 13004           | 88.38           | 11.62       | 2464              | 96.47           | 3.53        |
| Great Pyrenees                 | 6008            | 91.29           | 8.71        | 896               | 98.55           | 1.45        |
| Greater Swiss mountain dog     | 2776            | 84.62           | 15.38       | 2350              | 90.89           | 9.11        |
| Havanese                       | 3518            | 93.75           | 6.25        | 1961              | 94.54           | 5.46        |
| Irish setter                   | 11352           | 88.82           | 11.18       | 648               | 97.22           | 2.78        |

|                                           |        |       |       |       |       |       |
|-------------------------------------------|--------|-------|-------|-------|-------|-------|
| Irish water spaniel                       | 1369   | 89.04 | 10.96 | 545   | 84.40 | 15.60 |
| Irish wolfhound                           | 1903   | 95.53 | 4.47  | 756   | 87.70 | 12.30 |
| Keeshond                                  | 4816   | 94.25 | 5.75  | 1113  | 92.63 | 7.37  |
| Labrador retriever                        | 234382 | 88.76 | 11.24 | 72126 | 90.43 | 9.57  |
| Leonberger                                | 1793   | 87.28 | 12.72 | 1567  | 96.75 | 3.25  |
| Mastiff                                   | 10794  | 81.44 | 18.56 | 6114  | 86.87 | 13.13 |
| Miniature American Australian<br>shepherd | 1789   | 93.40 | 6.60  | 641   | 97.82 | 2.18  |
| Newfoundland                              | 15359  | 75.25 | 24.75 | 6682  | 77.30 | 22.70 |
| Nova Scotia Duck Tolling Retriever        | 2084   | 94.19 | 5.81  | 796   | 97.49 | 2.51  |
| Old English sheepdog                      | 10712  | 82.24 | 17.76 | 506   | 96.64 | 3.36  |
| Pembroke Welsh corgi                      | 11083  | 83.44 | 16.56 | 789   | 97.08 | 2.92  |
| Poodle                                    | 24039  | 89.01 | 10.99 | 2386  | 97.19 | 2.81  |
| Portugese water dog                       | 8132   | 89.02 | 10.98 | 3008  | 98.57 | 1.43  |
| Rhodesian Ridgeback                       | 11641  | 95.58 | 4.42  | 5979  | 95.05 | 4.95  |
| Rottweiler                                | 92718  | 79.93 | 20.07 | 16162 | 61.93 | 38.07 |
| Samoyed                                   | 16131  | 89.71 | 10.29 | 1463  | 98.15 | 1.85  |
| Shetland sheepdog                         | 20668  | 95.84 | 4.16  | 825   | 97.21 | 2.79  |
| Spinone Italiano                          | 1234   | 86.22 | 13.78 | 565   | 94.34 | 5.66  |
| Tibetan mastiff                           | 989    | 85.74 | 14.26 | 513   | 86.16 | 13.84 |
| Viszla                                    | 14191  | 93.81 | 6.19  | 2063  | 98.01 | 1.99  |
| Weimaraner                                | 12158  | 92.06 | 7.94  | 1652  | 98.43 | 1.57  |
| Welsh springer spaniel                    | 2102   | 89.20 | 10.80 | 763   | 98.56 | 1.44  |
