# Supplementary material for: Long-term genetic selection reduced prevalence of hip and elbow dysplasia in 60 dog breeds
Source: PubMed Central journal article supplement (PMC5325577; doi:10.1371/journal.pone.0172918), 2017-02-24
Supplement: pone.0172918.s002.pdf [file pone.0172918.s002.pdf]

**S2 Table. Impact of sex and age on the CHD and ED scores.**

| Breed                          | Sex Impact on Hip Score <sup>1</sup> | Sex Impact on Elbow Score <sup>1</sup> | Age Impact on Hip Score <sup>2</sup> |
|--------------------------------|--------------------------------------|----------------------------------------|--------------------------------------|
| Akita                          | -0.039 ± 0.03                        | <b>0.728 ± 0.282</b>                   | 0.005 ± 0.001                        |
| Alaskan malamute               | <b>-0.342 ± 0.036</b>                | <b>1.013 ± 0.267</b>                   | 0.002 ± 0.001                        |
| American Staffordshire terrier | <b>0.172 ± 0.07</b>                  | -0.195 ± 0.16                          | <b>0.005 ± 0.002</b>                 |
| Anatolian                      | -0.014 ± 0.092                       | 0.003 ± 0.282                          | <b>0.011 ± 0.004</b>                 |
| Australian cattle dog          | 0.116 ± 0.068                        | 0.009 ± 0.167                          | <b>0.007 ± 0.002</b>                 |
| Australian shepherd            | <b>0.046 ± 0.023</b>                 | <b>0.176 ± 0.08</b>                    | <b>0.002 ± 0.001</b>                 |
| Bearded Collie                 | <b>0.375 ± 0.06</b>                  | 0.487 ± 0.338                          | <b>0.009 ± 0.002</b>                 |
| Belgian Malinois               | -0.003 ± 0.082                       | 0.225 ± 0.13                           | 0 ± 0.003                            |
| Belgian sheepdog               | <b>0.15 ± 0.062</b>                  | <b>0.404 ± 0.15</b>                    | 0.003 ± 0.002                        |
| Belgian tervuren               | 0.077 ± 0.051                        | 0.216 ± 0.113                          | 0.002 ± 0.002                        |
| Bernese mountain dog           | -0.011 ± 0.027                       | 0.031 ± 0.035                          | <b>0.016 ± 0.002</b>                 |
| Bichon                         | <b>-0.225 ± 0.068</b>                | -0.27 ± 0.698                          | <b>0.005 ± 0.002</b>                 |
| Bloodhound                     | <b>-0.232 ± 0.073</b>                | -0.013 ± 0.136                         | 0.002 ± 0.003                        |
| Border collie                  | <b>0.140 ± 0.038</b>                 | <b>0.501 ± 0.214</b>                   | <b>0.006 ± 0.001</b>                 |
| Bouvier                        | <b>-0.098 ± 0.041</b>                | -0.05 ± 0.106                          | <b>0.008 ± 0.002</b>                 |
| Boxer                          | 0.002 ± 0.066                        | -0.315 ± 0.54                          | 0.001 ± 0.003                        |
| Briard                         | 0.125 ± 0.076                        | -10.842 ± 5.958                        | <b>0.007 ± 0.003</b>                 |
| Brittany                       | -0.057 ± 0.030                       | -0.099 ± 0.284                         | <b>0.005 ± 0.001</b>                 |
| Bullmastiff                    | <b>-0.108 ± 0.050</b>                | <b>0.299 ± 0.105</b>                   | <b>0.005 ± 0.002</b>                 |
| Cavalier King Charles spaniel  | <b>0.211 ± 0.052</b>                 | -0.665 ± 0.555                         | <b>0.005 ± 0.002</b>                 |
| Chesapeake bay retriever       | -0.034 ± 0.035                       | <b>0.365 ± 0.117</b>                   | <b>0.006 ± 0.001</b>                 |
| Chinese shar-pei               | <b>-0.129 ± 0.045</b>                | 0.221 ± 0.175                          | <b>0.011 ± 0.002</b>                 |
| Chowchow                       | <b>0.119 ± 0.054</b>                 | 0.114 ± 0.107                          | <b>0.005 ± 0.002</b>                 |
| Doberman pinscher              | <b>0.077 ± 0.033</b>                 | 0.202 ± 0.254                          | 0 ± 0.001                            |
| English setter                 | <b>0.109 ± 0.037</b>                 | <b>0.468 ± 0.094</b>                   | 0 ± 0.001                            |
| English Springer               | <b>-0.003 ± 0.035</b>                | <b>0.469 ± 0.112</b>                   | 0.002 ± 0.001                        |
| Flat coated retriever          | -0.027 ± 0.051                       | 0.539 ± 0.372                          | <b>0.005 ± 0.002</b>                 |
| German Shepherd                | -0.141 ± 0.034                       | <b>0.364 ± 0.051</b>                   | 0.003 ± 0.001                        |
| German shorthaired pointer     | <b>0.101 ± 0.032</b>                 | 0.374 ± 0.259                          | 0.002 ± 0.001                        |
| German wirehaired pointer      | 0.026 ± 0.06                         | 0.049 ± 0.306                          | 0.004 ± 0.002                        |
| Giant schnauzer                | <b>-0.299 ± 0.059</b>                | <b>0.674 ± 0.222</b>                   | <b>0.007 ± 0.003</b>                 |
| Golden retriever               | -0.002 ± 0.036                       | <b>0.21 ± 0.075</b>                    | <b>0.01 ± 0.001</b>                  |
| Gordon setter                  | <b>0.215 ± 0.051</b>                 | <b>0.412 ± 0.149</b>                   | <b>0.01 ± 0.002</b>                  |
| Great dane                     | -0.003 ± 0.033                       | -0.151 ± 0.148                         | 0.002 ± 0.002                        |
| Great Pyrenees                 | -0.025 ± 0.051                       | 0.455 ± 0.362                          | 0.002 ± 0.002                        |
| Greater Swiss mountain dog     | 0.132 ± 0.072                        | -0.235 ± 0.126                         | <b>0.018 ± 0.005</b>                 |
| Havanese                       | -0.02 ± 0.074                        | 0.246 ± 0.246                          | 0.004 ± 0.003                        |
| Irish setter                   | <b>0.183 ± 0.035</b>                 | 0.543 ± 0.537                          | <b>0.006 ± 0.001</b>                 |

|                                        |                       |                       |                      |
|----------------------------------------|-----------------------|-----------------------|----------------------|
| Irish water spaniel                    | 0.118 ± 0.109         | 0.265 ± 0.19          | 0.005 ± 0.005        |
| Irish wolfhound                        | -0.156 ± 0.099        | <b>0.457 ± 0.221</b>  | -0.002 ± 0.004       |
| Keeshond                               | 0.037 ± 0.06          | 0.186 ± 0.158         | <b>0.007 ± 0.002</b> |
| Labrador retriever                     | -0.013 ± 0.034        | <b>0.241 ± 0.063</b>  | 0.002 ± 0.001        |
| Leonberger                             | -0.176 ± 0.107        | -0.112 ± 0.183        | <b>0.026 ± 0.006</b> |
| Mastiff                                | -0.016 ± 0.037        | 0.074 ± 0.063         | 0.009 ± 0.002        |
| Miniature American Australian shepherd | -0.024 ± 0.096        | 0.147 ± 0.408         | 0.003 ± 0.004        |
| Newfoundland                           | <b>-0.058 ± 0.029</b> | <b>0.203 ± 0.055</b>  | <b>0.009 ± 0.001</b> |
| Nova Scotia Duck Tolling Retriever     | <b>-0.197 ± 0.1</b>   | 0.196 ± 0.297         | <b>0.014 ± 0.004</b> |
| Old English sheepdog                   | -0.029 ± 0.04         | 0.361 ± 0.284         | <b>0.005 ± 0.002</b> |
| Pembroke Welsh corgi                   | <b>-0.221 ± 0.037</b> | 0.118 ± 0.269         | <b>0.006 ± 0.001</b> |
| Poodle                                 | 0.029 ± 0.027         | 0.249 ± 0.187         | <b>0.006 ± 0.001</b> |
| Portugese water dog                    | <b>0.099 ± 0.041</b>  | 0.168 ± 0.167         | <b>0.014 ± 0.002</b> |
| Rhodesian Ridgeback                    | <b>0.175 ± 0.037</b>  | <b>-0.246 ± 0.085</b> | <b>0.005 ± 0.002</b> |
| Rottweiler                             | <b>-0.163 ± 0.029</b> | <b>0.39 ± 0.047</b>   | <b>0.003 ± 0.001</b> |
| Samoyed                                | -0.037 ± 0.029        | -0.267 ± 0.247        | <b>0.005 ± 0.001</b> |
| Shetland sheepdog                      | <b>-0.207 ± 0.031</b> | 0.066 ± 0.275         | <b>0.007 ± 0.001</b> |
| Spinone Italiano                       | <b>-0.337 ± 0.112</b> | -0.03 ± 0.257         | 0.005 ± 0.005        |
| Tibetan mastiff                        | 0.076 ± 0.145         | <b>0.402 ± 0.194</b>  | -0.006 ± 0.005       |
| Vizsla                                 | <b>0.215 ± 0.037</b>  | 0.068 ± 0.231         | -0.001 ± 0.001       |
| Weimaraner                             | <b>-0.146 ± 0.035</b> | 0.294 ± 0.247         | 0.002 ± 0.001        |
| Welsh springer spaniel                 | -0.007 ± 0.089        | 0.884 ± 0.745         | 0.001 ± 0.004        |

<sup>1</sup>Bold numbers indicate significantly different from zero. Positive values reflect a decreased risk of CHD or ED for females and negative values reflect a decreased risk in males

<sup>2</sup>Bold numbers indicate significantly different from zero and positive values reflect an increased risk of CHD or ED for older animals and negative values reflect an increased risk in younger animals
